# Supplementary material for: High-gamma frequency-tagged magnetoencephalography reveals white matter-mediated dynamics of task-specific functional connectivity in spatial cognition
Source: Research Square preprint supplement (doi:10.21203/rs.3.rs-7949583/v1), 2025-11-11
Supplement: Supplementary file 1 [file d8aba735748b6c52fd64423b.docx]

**High-gamma frequency-tagged magnetoencephalography reveals white matter-mediated dynamics of task-specific functional connectivity in spatial cognition**

Kenji YOSHIKI a, Masashi KINOSHITA b, Ruochu XIONG a, Yoshihiro MIKASA c, Kiwamu KUDO c, Eiichi OKUMURA c, Hirofumi MORISE c, Riho NAKAJIMA d, Mitsutoshi NAKADA b, e
